# Supplementary material for: Glymphatic Dysfunction in Patients With End-Stage Renal Disease
Source: Frontiers journal article supplement (doi:10.3389/fneur.2021.809438), 2022-01-25
Supplement: Data_Sheet_2.PDF [file Data_Sheet_2.PDF]

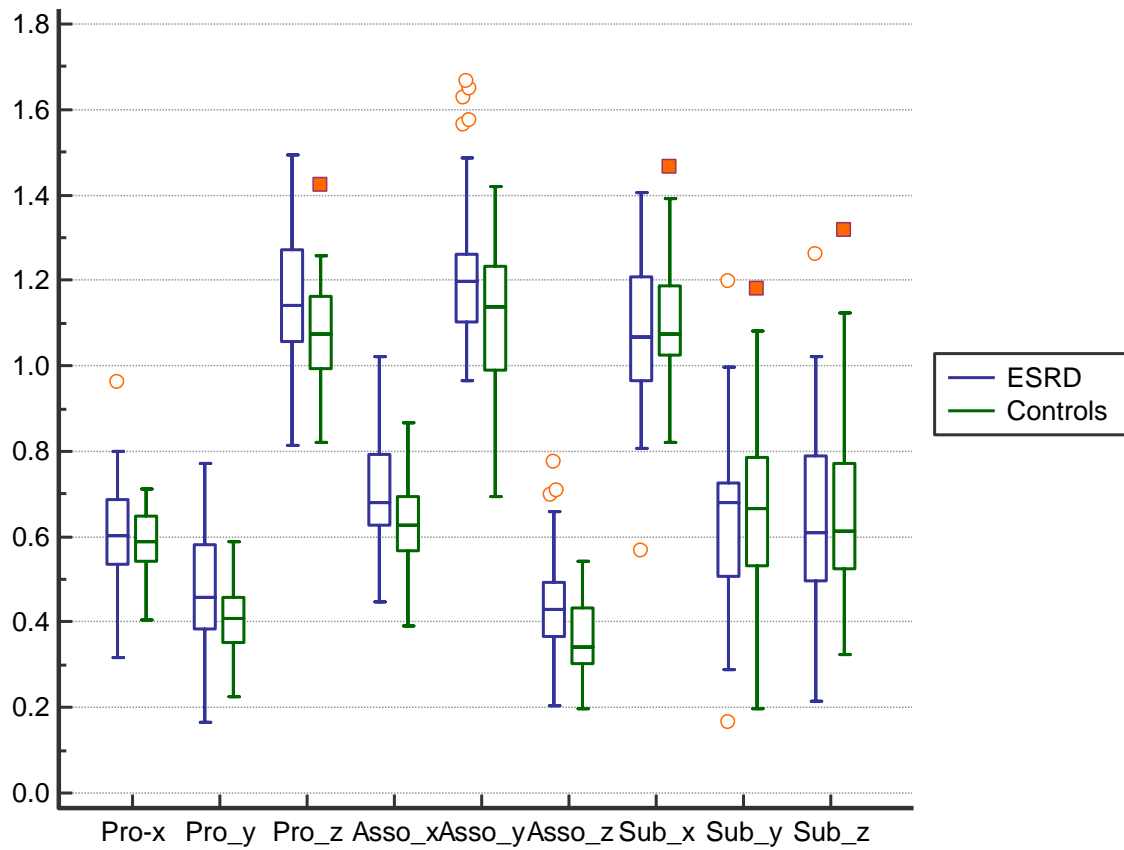

## Suppl. 2. Diffusivity along the axis in the fibers

Diffusivities along the x-axis, y-axis, and z-axis in the association fiber and along the y-axis and z-axis in the subcortical fiber in patients with ESRD appear significantly different from those in the healthy controls ( $\times 10^{-3}$ ).

ESRD: end-stage renal disease; Pro\_x: diffusivity along the x-axis in the projection fiber; Pro\_y: diffusivity along the y-axis in the projection fiber; Pro\_z: diffusivity along the z-axis in the projection fiber; Asso\_x: diffusivity along the x-axis in the association fiber; Asso\_y: diffusivity along the y-axis in the association fiber; Asso\_z: diffusivity along the z-axis in the association fiber; Sub\_x: diffusivity along the x-axis in the subcortical fiber; Sub\_y: diffusivity along the y-axis in the subcortical fiber; Sub\_z: diffusivity along the z-axis in the subcortical fiber.
